# Supplementary material for: Biocompatible and Thermoresistant Hydrogels Based on Collagen and Chitosan
Source: MDPI journal article supplement (doi:10.3390/polym14020272), 2022-01-10
Supplement: s1 [file s1]

## Supplementary Material

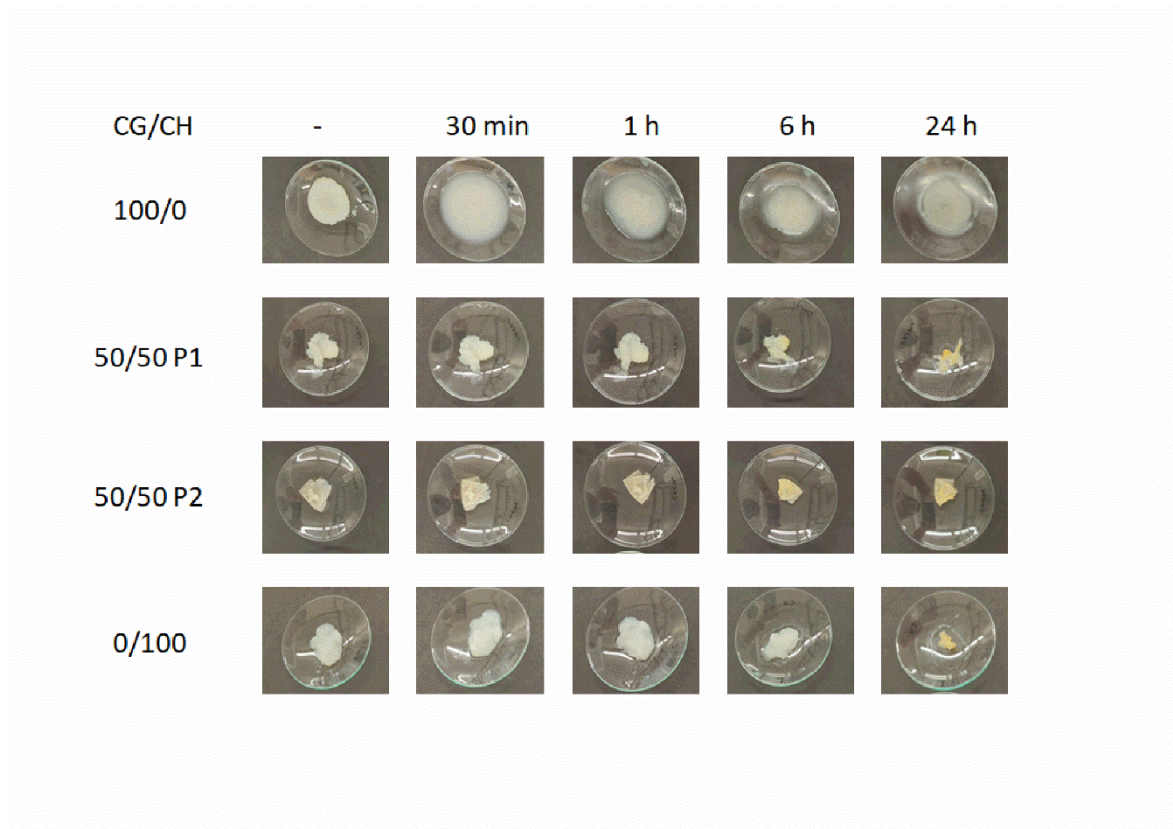

**Figure S1:** Macroscopical images of the selected hydrogels subjected at 40 °C with the time.
